# Supplementary material for: Carbohydrate supplementation retains intestinal barrier and ameliorates bacterial translocation in an antibiotic-induced mouse model
Source: Royal Society of Chemistry journal article supplement (doi:10.1039/d3fo01343j), 2023-01-01
Supplement: d3fo01343j1.pdf [file d3fo01343j1.pdf]

# **Title: Carbohydrate supplementation retains intestinal barrier and ameliorates bacterial translocation in an antibiotic-induced mice model**

## **Supplementary information**

Author: Yuan Zhang<sup>1,2</sup>, Waleed A.S. Aldamarany<sup>1,3</sup>, Liling Deng<sup>4</sup>, Geng Zhong<sup>1,2,\*</sup>

Author Affiliation:

1 College of Food Science, Southwest University, Chongqing, 400715, China

2 Chongqing Key Laboratory of Speciality Food Co-Built by Sichuan and Chongqing, Southwest University, Chongqing, 400715, China

3 Food Science and Technology Department, Faculty of Agriculture, Al-Azhar University (Assiut Branch), Assiut 71524, Egypt

4 Chongqing Key Laboratory of High Active Traditional Chinese Drug Delivery System, Chongqing Engineering Research Center of Pharmaceutical Sciences, Chongqing Medical and Pharmaceutical College, Chongqing 401331, China

Corresponding author: Geng Zhong

Postal address: College of Food Science, Southwest University, Beibei District, Chongqing, 400715, P.R.China.

E-mail address: [zhongdg@126.com](mailto:zhongdg@126.com)

**Table S1** Properties of antibiotics

| Antibiotics      | Class           | Predominant spectrum       | Mechanism of action          |
|------------------|-----------------|----------------------------|------------------------------|
| Amoxicillin      | $\beta$ -lactam | Gram+/ Gram- bacteriocidal | Inhibits cell wall synthesis |
| Neomycin sulfate | Aminoglycoside  | Gram- bacteriocidal        | Inhibits protein synthesis   |
| Vancomycin       | Glycopeptide    | Gram+ bacteriocidal        | Inhibits cell wall synthesis |
| Methonidazole    | Nitroimidazole  | Anaerobes bacteriocidal    | Inhibits DNA synthesis       |

**Table S2** Body weight gain and average food intake

|                           | Groups  | Body weight gain (%)             | Food intake (g/d)              |
|---------------------------|---------|----------------------------------|--------------------------------|
| Abx administration period | Control | 50.575 $\pm$ 5.044 <sup>a</sup>  | 6.092 $\pm$ 0.178 <sup>a</sup> |
|                           | Abx     | 43.054 $\pm$ 4.225 <sup>ab</sup> | 6.456 $\pm$ 0.216 <sup>a</sup> |
|                           | KGM     | 35.413 $\pm$ 8.189 <sup>b</sup>  | 5.155 $\pm$ 0.255 <sup>a</sup> |
|                           | DKGM    | 32.937 $\pm$ 5.835 <sup>b</sup>  | 5.090 $\pm$ 0.657 <sup>a</sup> |
|                           | KOGM    | 45.090 $\pm$ 8.600 <sup>a</sup>  | 5.610 $\pm$ 0.294 <sup>a</sup> |
| Recovery period           | CN      | 8.787 $\pm$ 2.875 <sup>a</sup>   | 5.914 $\pm$ 0.510 <sup>a</sup> |
|                           | AN      | 9.850 $\pm$ 1.633 <sup>a</sup>   | 6.321 $\pm$ 0.362 <sup>a</sup> |
|                           | KK      | 5.771 $\pm$ 2.001 <sup>a</sup>   | 5.923 $\pm$ 0.311 <sup>a</sup> |
|                           | KN      | 7.076 $\pm$ 4.935 <sup>a</sup>   | 5.683 $\pm$ 0.293 <sup>a</sup> |
|                           | DD      | 4.377 $\pm$ 0.050 <sup>a</sup>   | 5.891 $\pm$ 0.206 <sup>a</sup> |
|                           | DN      | 10.967 $\pm$ 1.868 <sup>a</sup>  | 5.695 $\pm$ 0.385 <sup>a</sup> |
|                           | KOKO    | 5.355 $\pm$ 0.056 <sup>a</sup>   | 6.341 $\pm$ 0.263 <sup>a</sup> |
|                           | KON     | 8.958 $\pm$ 4.011 <sup>a</sup>   | 5.836 $\pm$ 0.161 <sup>a</sup> |

Note: Data are mean  $\pm$  SD of ten replicates. Values of different periods in the same column with different letters are significantly different (P < 0.05).

**Table S3** Visceral index of mice in Abx administration period and recovery period

|                           | Viscera Index | Heart                        | Liver                        | Spleen                       | Lung                         | Kidney                       | Small intestine              | Colon                        |
|---------------------------|---------------|------------------------------|------------------------------|------------------------------|------------------------------|------------------------------|------------------------------|------------------------------|
| Abx administration period | Control       | 0.0066 ± 0.0028 <sup>a</sup> | 0.0432 ± 0.0046 <sup>a</sup> | 0.0022 ± 0.0003 <sup>a</sup> | 0.0054 ± 0.0010 <sup>a</sup> | 0.0151 ± 0.0018 <sup>a</sup> | 0.0334 ± 0.007 <sup>a</sup>  | 0.0099 ± 0.0027 <sup>a</sup> |
|                           | Abx           | 0.0056 ± 0.0011 <sup>a</sup> | 0.0442 ± 0.0066 <sup>a</sup> | 0.0022 ± 0.0005 <sup>a</sup> | 0.0051 ± 0.0010 <sup>a</sup> | 0.0152 ± 0.0035 <sup>a</sup> | 0.0377 ± 0.0059 <sup>a</sup> | 0.0115 ± 0.003 <sup>a</sup>  |
|                           | KGM           | 0.0054 ± 0.0009 <sup>a</sup> | 0.0412 ± 0.0030 <sup>a</sup> | 0.0023 ± 0.0003 <sup>a</sup> | 0.0062 ± 0.001 <sup>a</sup>  | 0.0137 ± 0.0032 <sup>a</sup> | 0.0365 ± 0.0034 <sup>a</sup> | 0.0123 ± 0.0031 <sup>a</sup> |
|                           | DKGM          | 0.0051 ± 0.0009 <sup>a</sup> | 0.0389 ± 0.0031 <sup>a</sup> | 0.0022 ± 0.0004 <sup>a</sup> | 0.0053 ± 0.0014 <sup>a</sup> | 0.0136 ± 0.0023 <sup>a</sup> | 0.0354 ± 0.0024 <sup>a</sup> | 0.0114 ± 0.0034 <sup>a</sup> |
|                           | KOGM          | 0.0064 ± 0.0019 <sup>a</sup> | 0.0405 ± 0.0058 <sup>a</sup> | 0.0028 ± 0.0011 <sup>a</sup> | 0.0059 ± 0.0013 <sup>a</sup> | 0.0156 ± 0.0015 <sup>a</sup> | 0.035 ± 0.0074 <sup>a</sup>  | 0.0125 ± 0.0029 <sup>a</sup> |
| Recovery period           | CN            | 0.0068 ± 0.0011 <sup>a</sup> | 0.0369 ± 0.0059 <sup>a</sup> | 0.0026 ± 0.0008 <sup>a</sup> | 0.0059 ± 0.0008 <sup>a</sup> | 0.0159 ± 0.0013 <sup>a</sup> | 0.0306 ± 0.0019 <sup>a</sup> | 0.0107 ± 0.0042 <sup>a</sup> |
|                           | AN            | 0.0061 ± 0.0011 <sup>a</sup> | 0.0353 ± 0.0047 <sup>a</sup> | 0.0023 ± 0.0004 <sup>a</sup> | 0.0053 ± 0.0015 <sup>a</sup> | 0.0124 ± 0.0039 <sup>a</sup> | 0.0309 ± 0.0108 <sup>a</sup> | 0.0124 ± 0.0052 <sup>a</sup> |
|                           | KK            | 0.0062 ± 0.001 <sup>a</sup>  | 0.0374 ± 0.003 <sup>a</sup>  | 0.0023 ± 0.0008 <sup>a</sup> | 0.0057 ± 0.0007 <sup>a</sup> | 0.0137 ± 0.001 <sup>a</sup>  | 0.0343 ± 0.0056 <sup>a</sup> | 0.0118 ± 0.0027 <sup>a</sup> |
|                           | KN            | 0.0065 ± 0.0012 <sup>a</sup> | 0.0373 ± 0.0057 <sup>a</sup> | 0.0022 ± 0.0004 <sup>a</sup> | 0.0053 ± 0.0011 <sup>a</sup> | 0.0133 ± 0.0019 <sup>a</sup> | 0.0343 ± 0.0056 <sup>a</sup> | 0.0114 ± 0.0026 <sup>a</sup> |
|                           | DD            | 0.0063 ± 0.001 <sup>a</sup>  | 0.0389 ± 0.0041 <sup>a</sup> | 0.0022 ± 0.0002 <sup>a</sup> | 0.0057 ± 0.0007 <sup>a</sup> | 0.0145 ± 0.0024 <sup>a</sup> | 0.0316 ± 0.0041 <sup>a</sup> | 0.0113 ± 0.003 <sup>a</sup>  |
|                           | DN            | 0.006 ± 0.0009 <sup>a</sup>  | 0.0375 ± 0.0034 <sup>a</sup> | 0.0026 ± 0.0009 <sup>a</sup> | 0.0054 ± 0.0012 <sup>a</sup> | 0.0134 ± 0.0022 <sup>a</sup> | 0.031 ± 0.0033 <sup>a</sup>  | 0.0109 ± 0.0017 <sup>a</sup> |
|                           | KOKO          | 0.006 ± 0.0013 <sup>a</sup>  | 0.0333 ± 0.0028 <sup>a</sup> | 0.0022 ± 0.0002 <sup>a</sup> | 0.0055 ± 0.0011 <sup>a</sup> | 0.0147 ± 0.0017 <sup>a</sup> | 0.0317 ± 0.0042 <sup>a</sup> | 0.0127 ± 0.0038 <sup>a</sup> |
|                           | KON           | 0.0066 ± 0.0019 <sup>a</sup> | 0.0371 ± 0.0045 <sup>a</sup> | 0.0029 ± 0.001 <sup>a</sup>  | 0.006 ± 0.0009 <sup>a</sup>  | 0.0152 ± 0.0037 <sup>a</sup> | 0.0323 ± 0.0037 <sup>a</sup> | 0.0099 ± 0.0026 <sup>a</sup> |

Note: Data are mean ± SD of ten replicates. Values of different periods in the same column with different letters are significantly different (P < 0.05).

**Table S4** Correlation between systemic inflammation cytokines and biomarkers of BT during Abx administration

| BT biomarkers | Inflammation biomarkers | spearman R | P value |
|---------------|-------------------------|------------|---------|
| LBP           | IL-17                   | 0.512*     | 0.030   |
|               | IL-10                   | 0.215      | 0.391   |
|               | CRP                     | 0.407      | 0.094   |
|               | TNF- $\alpha$           | 0.119      | 0.639   |
| sCD14         | IL-17                   | 0.397      | 0.060   |
|               | IL-10                   | 0.346      | 0.106   |
|               | CRP                     | 0.091      | 0.703   |
|               | TNF- $\alpha$           | 0.569**    | 0.007   |
| sCD163        | IL-17                   | 0.503*     | 0.014   |
|               | IL-10                   | 0.051      | 0.813   |
|               | CRP                     | 0.598**    | 0.005   |
|               | TNF- $\alpha$           | 0.375      | 0.094   |
| EndoCab IgM   | IL-17                   | -0.251     | 0.249   |
|               | IL-10                   | -0.060     | 0.776   |
|               | CRP                     | -0.467*    | 0.038   |
|               | TNF- $\alpha$           | -0.525*    | 0.015   |
| EndoCab IgG   | IL-17                   | 0.246      | 0.257   |
|               | IL-10                   | 0.387      | 0.056   |
|               | CRP                     | -0.430     | 0.058   |
|               | TNF- $\alpha$           | -0.030     | 0.898   |

\* Represents  $p < 0.05$  with significant correlation.\*\* indicates  $p < 0.01$  with significant correlation.

**Table S5** Correlation between systemic inflammation cytokines and biomarkers of BT in recovery period

| BT biomarkers | Inflammation biomarkers | spearman R | P value |
|---------------|-------------------------|------------|---------|
| LBP           | IL-17                   | -0.013     | 0.947   |
|               | IL-10                   | 0.232      | 0.160   |
|               | CRP                     | 0.227      | 0.170   |
|               | TNF- $\alpha$           | 0.109      | 0.516   |
| sCD14         | IL-17                   | 0.024      | 0.899   |
|               | IL-10                   | -0.329*    | 0.044   |
|               | CRP                     | 0.735**    | 0.000   |
|               | TNF- $\alpha$           | 0.793**    | 0.000   |
| sCD163        | IL-17                   | 0.403*     | 0.025   |
|               | IL-10                   | -0.264     | 0.114   |
|               | CRP                     | 0.368*     | 0.025   |
|               | TNF- $\alpha$           | 0.504**    | 0.001   |
| EndoCab IgM   | IL-17                   | -0.208     | 0.262   |
|               | IL-10                   | 0.247      | 0.141   |
|               | CRP                     | -0.518**   | 0.001   |
|               | TNF- $\alpha$           | -0.619**   | 0.000   |
| EndoCab IgG   | IL-17                   | -0.202     | 0.277   |
|               | IL-10                   | -0.236     | 0.154   |
|               | CRP                     | 0.117      | 0.484   |
|               | TNF- $\alpha$           | 0.069      | 0.681   |

Note: \* Represents  $p < 0.05$  with significant correlation. \*\* indicates  $p < 0.01$  with significant correlation.

**Table S6** Records of light microscope observation of colon

|                           | Group   | Results                                                                                               |
|---------------------------|---------|-------------------------------------------------------------------------------------------------------|
| Abx administration period | Control | (-)                                                                                                   |
|                           | Abx     | Lesions in mucosal and lamina propria layers (++)<br>Inflammatory cell infiltration (++)              |
|                           | KGM     | (-)                                                                                                   |
|                           | DKGM    | Inflammatory cell infiltration (+)                                                                    |
|                           | KOGM    | (-)                                                                                                   |
| Post-antibiotic period    | CN      | (-)                                                                                                   |
|                           | AN      | Lesions in mucosal and lamina propria layers (+++)<br>Inflammatory cell infiltration (++)             |
|                           | KK      | (-)                                                                                                   |
|                           | KN      | Light lesions in mucosal and lamina propria layers (+)<br>Light infiltration of Inflammatory cell (+) |
|                           | DD      | Inflammatory cell infiltration (+)                                                                    |
|                           | DN      | Lesions in mucosal and lamina propria layers (++)<br>Light infiltration of Inflammatory cell (++)     |
|                           | KOKO    | (-)                                                                                                   |
|                           | KON     | Light lesions in mucosal and lamina propria layers (+)<br>Light infiltration of Inflammatory cell (+) |

(+) or (-) indicated that lesions could be observed or not.

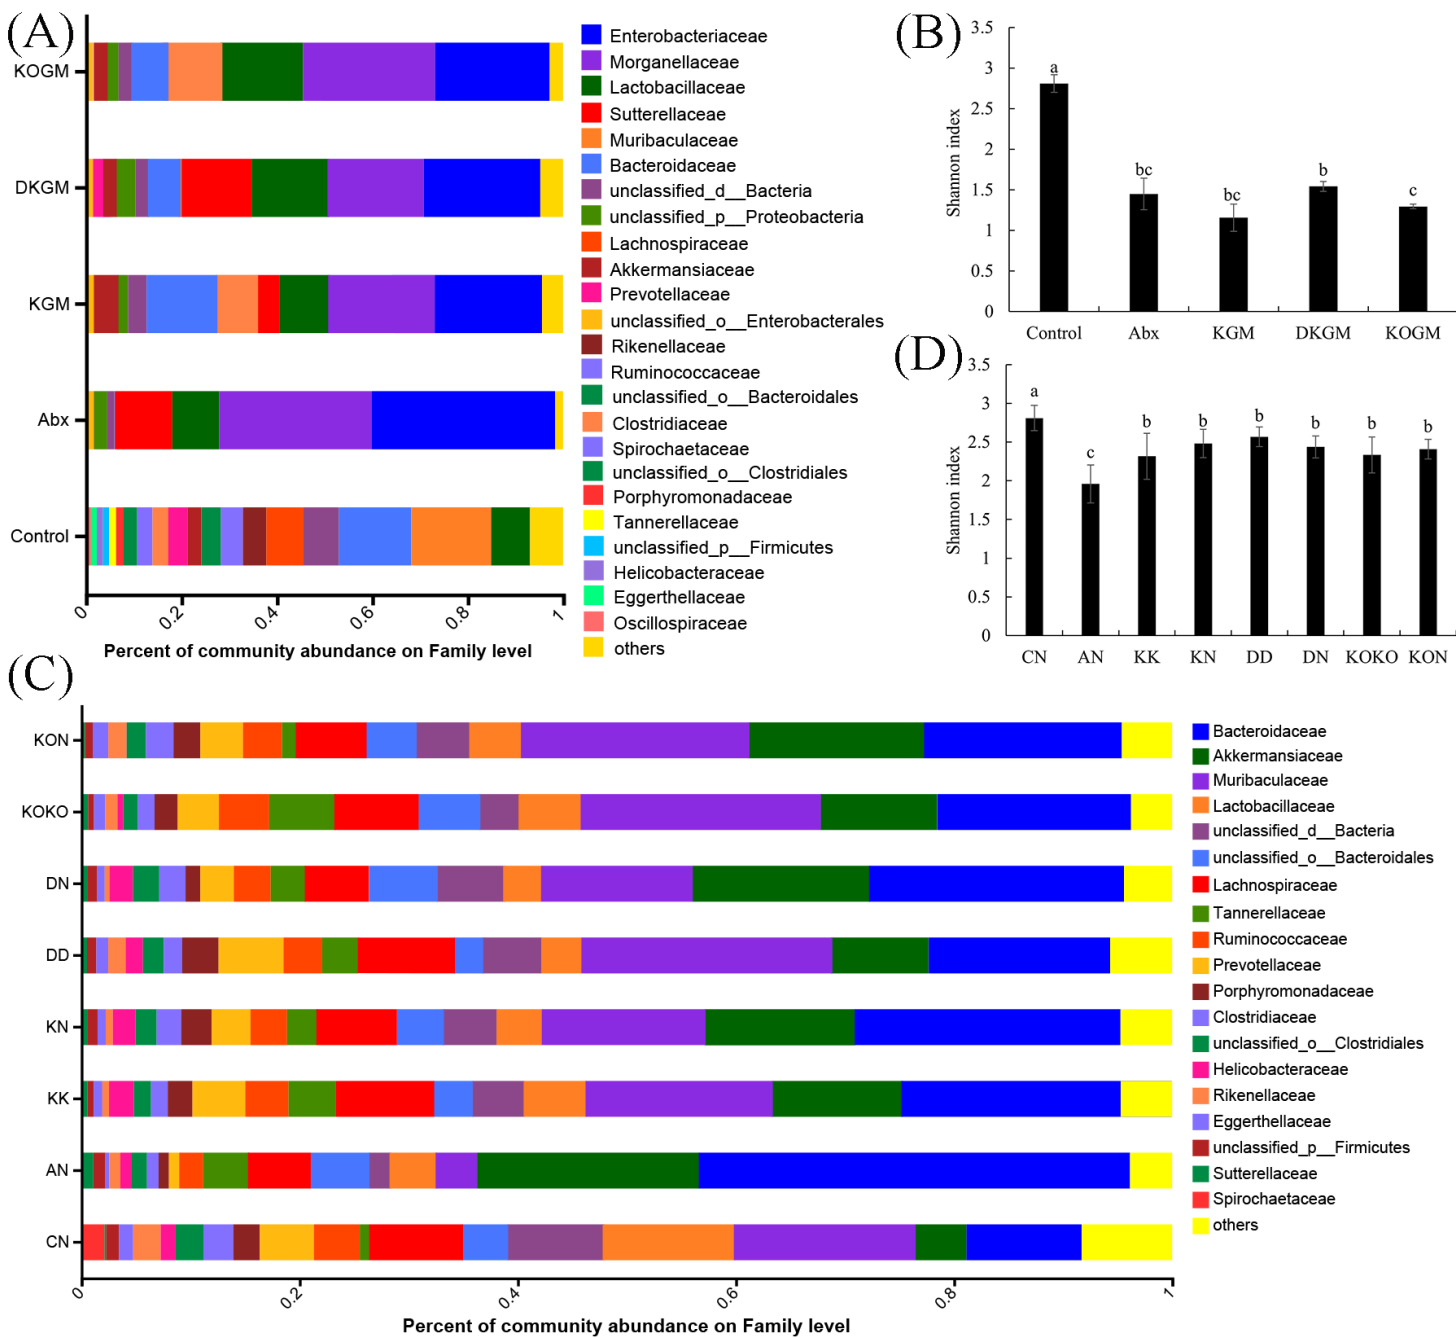

Metagenomics: total genomic DNA was extracted from fecal samples using the E.Z.N.A.<sup>®</sup> Soil DNA Kit (Omega Bio-tek, Norcross, GA, U.S.) according to manufacturer's instructions. After library construction, metagenomic sequencing was performed on Illumina NovaSeq (Illumina Inc., San Diego, CA, USA) at Majorbio Bio-Pharm Technology Co., Ltd. (Shanghai, China). Reads after quality control were mapped to the non-redundant gene catalog with 95% identity using SOAPaligner (version 2.21) and gene abundance in each sample was evaluated. Representative sequences of non-redundant gene catalog were annotated based on the NCBI NR database using blastp as implemented in DIAMOND v0.9.19 with e-value cutoff of  $1e^{-5}$  using Diamond (version 0.8.35) for taxonomic annotations.

As showed in Fig. S1 A and B, antibiotic treatment caused gut microbial disturbances, characterized with significantly reduced microbial diversity. The dominant microbial family dramatically changed, for example, *Enterobacteriaceae* and *Morganellaceae*, which belong to phylum *Proteobacteria* became predominant in Abx group instead of *Muribaculaceae* and *Bacteroidaceae*, compared with Control. KGM and its derivatives significantly altered the composition of gut microbiota by inhibiting antibiotic-induced flourish of *Enterobacteriaceae* and *Morganellaceae*, and retaining a certain structure of normal intestinal microorganisms, such as *Lactobacillaceae* (SCFAs producer), *Muribaculaceae* (SCFAs producer), *Bacteroidaceae* (SCFAs producer) and *Akkermansiaceae*.

Figure. S1 C and D exhibited the results of microbial composition and diversity after antibiotic administration. When the antibiotic administration was stopped, the microorganisms in each group were recovered to a certain extent after a 14-day recovery period, but the diversity was not completely recovered. Natural recovery (AN group) led to the abnormal proliferation of family *Bacteroidaceae*, while other families did not recover well. *Akkermansiaceae*, from phylum *Verrucomicrobia*, overgrew too in AN group. But the families in phylum *Firmicutes* and *unclassified\_d\_\_Bacteria* recovered poorly. The intervention of KGM and its derivatives significantly increased the microbial diversity, decreased the proportion of *Bacteroidaceae* and *Akkermansiaceae*, and promoted the recovery of families with less resilience, such as *Muribaculaceae*, *unclassified\_d\_\_Bacteria*, *Lachnospiraceae* and *Prevotellaceae*, thereby boosted the microbial composition ratio to a more normal level.

**Figure S1** Analysis of microbial composition and diversity during (A,B) and after (C,D) antibiotic administration .
